# Supplementary material for: Motor Program Transformation of Throwing Dart from the Third-Person Perspective
Source: MDPI journal article supplement (doi:10.3390/brainsci10010055), 2020-01-18
Supplement: s1 [file s1]

# Supplementary Material: Motor Program Transformation of Throwing Dart from the Third- Person Perspective

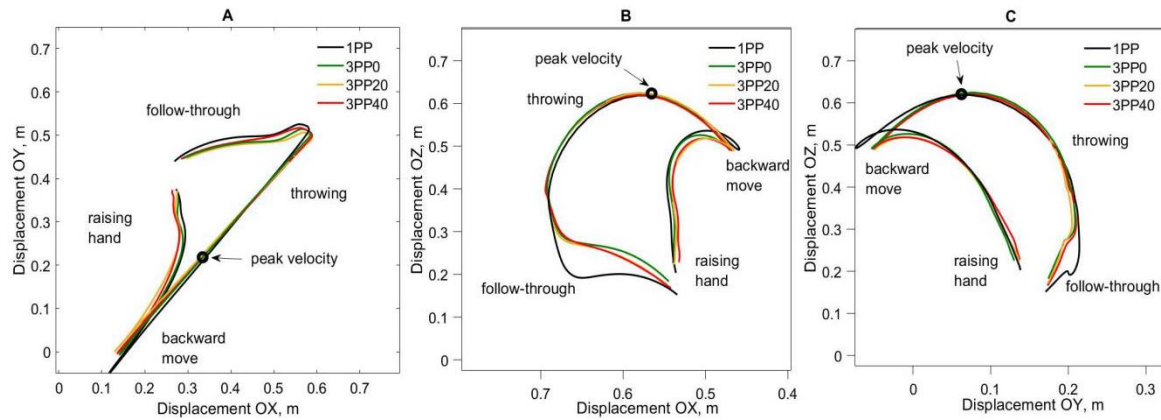

**Figure S1.** Mean right hand trajectories when throwing darts in the four Conditions for all subjects.  
**A.** The trajectory of the right hand on the XY plane. **B.** The trajectory of the right hand on the XZ plane.  
**C.** The trajectory of the right hand on the YZ plane.

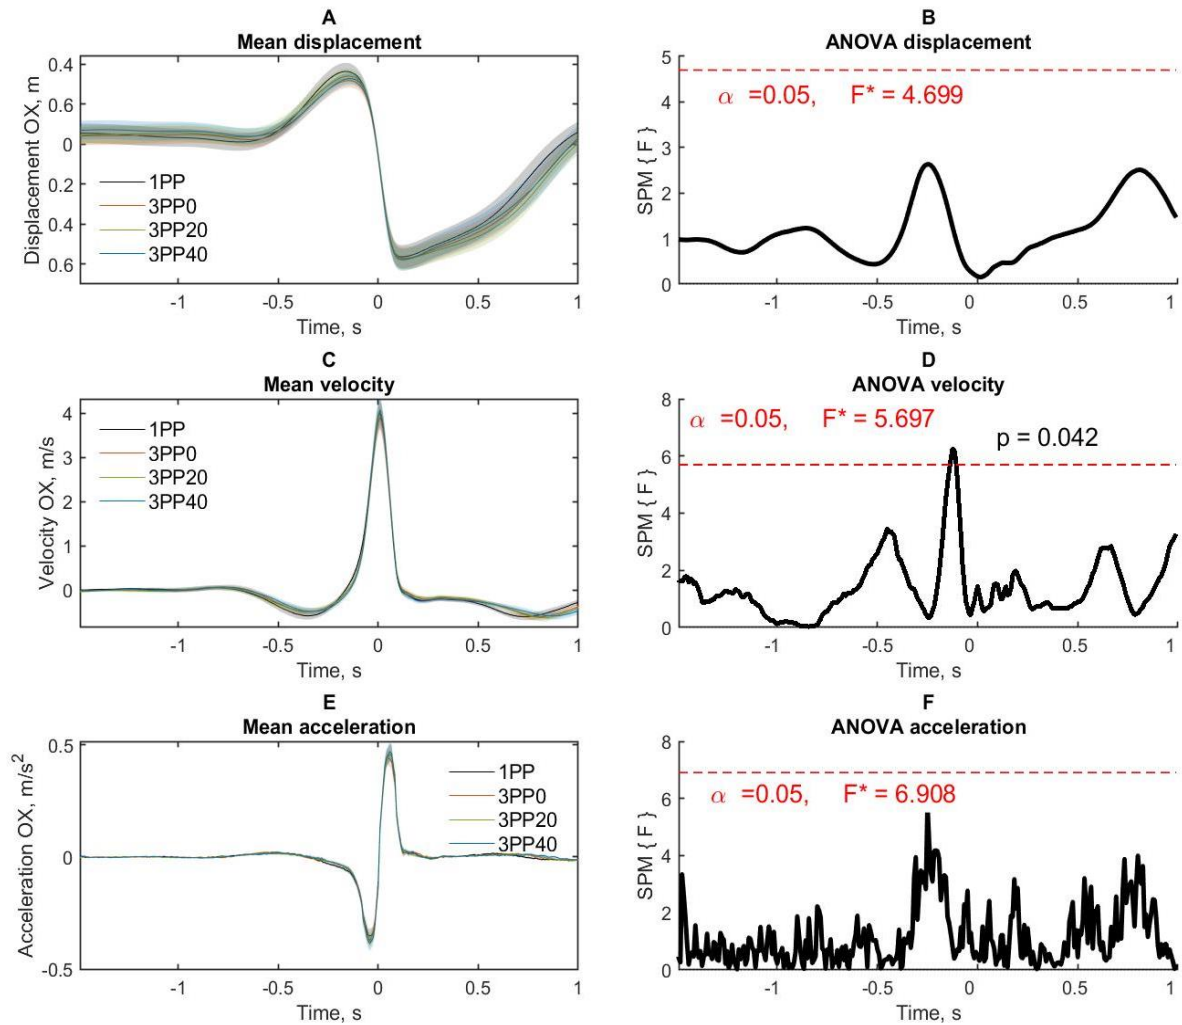

**Figure S2.** The right hand kinematic data along the OX axis. **A, C, E.** Displacement, velocity, acceleration of the right hand in four Conditions of throws. Semitransparent areas around lines are standard error of mean. **B, D, F.** Effect of Condition on ANOVA along the OX axis. Red dashed lines denotes the statistically significant level (with FWER correction). 1PP – first person condition, 3PP0 – third-person perspectives with 0°, 3PP20 – third-person perspectives with 20°, 3PP40 – third-person perspectives with 40°. Time 0 represents the moment of peak velocity of the right hand moving along the OY axis (along the direction of the throw).

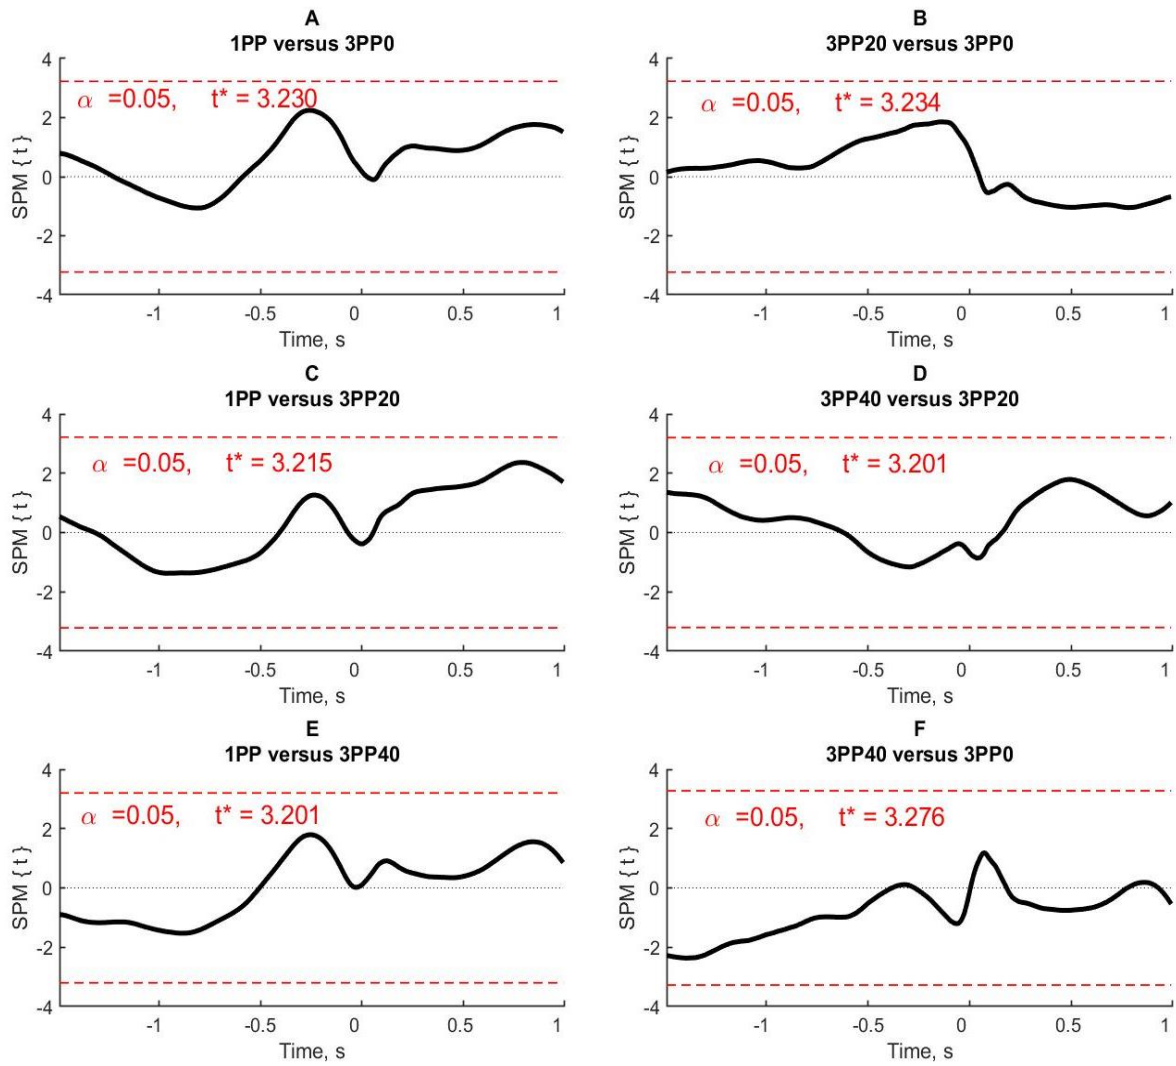

**Figure S3.** Pairwise comparisons mean displacement between conditions along the OX axis. Red dashed lines denotes the statistically significant level (with FWER correction). Time 0 represents the moment of peak velocity of the right hand moving along the OY axis (along the direction of the throw).

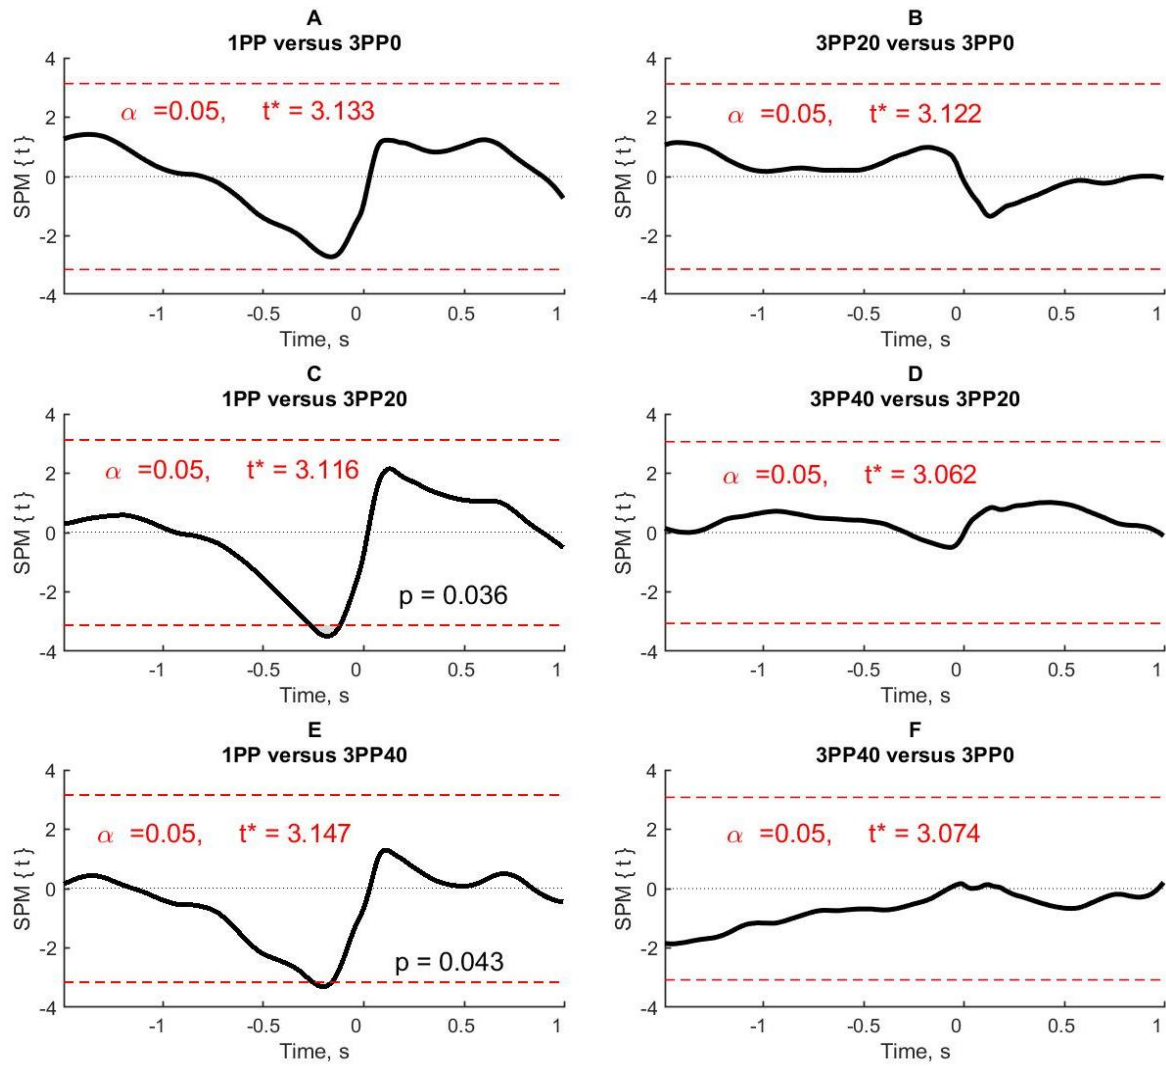

**Figure S4.** Pairwise comparisons mean displacement between conditions along the OY axis. Red dashed lines denotes the statistically significant level (with FWER correction). Time 0 represents the moment of peak velocity of the right hand moving along the OY axis (along the direction of the throw).

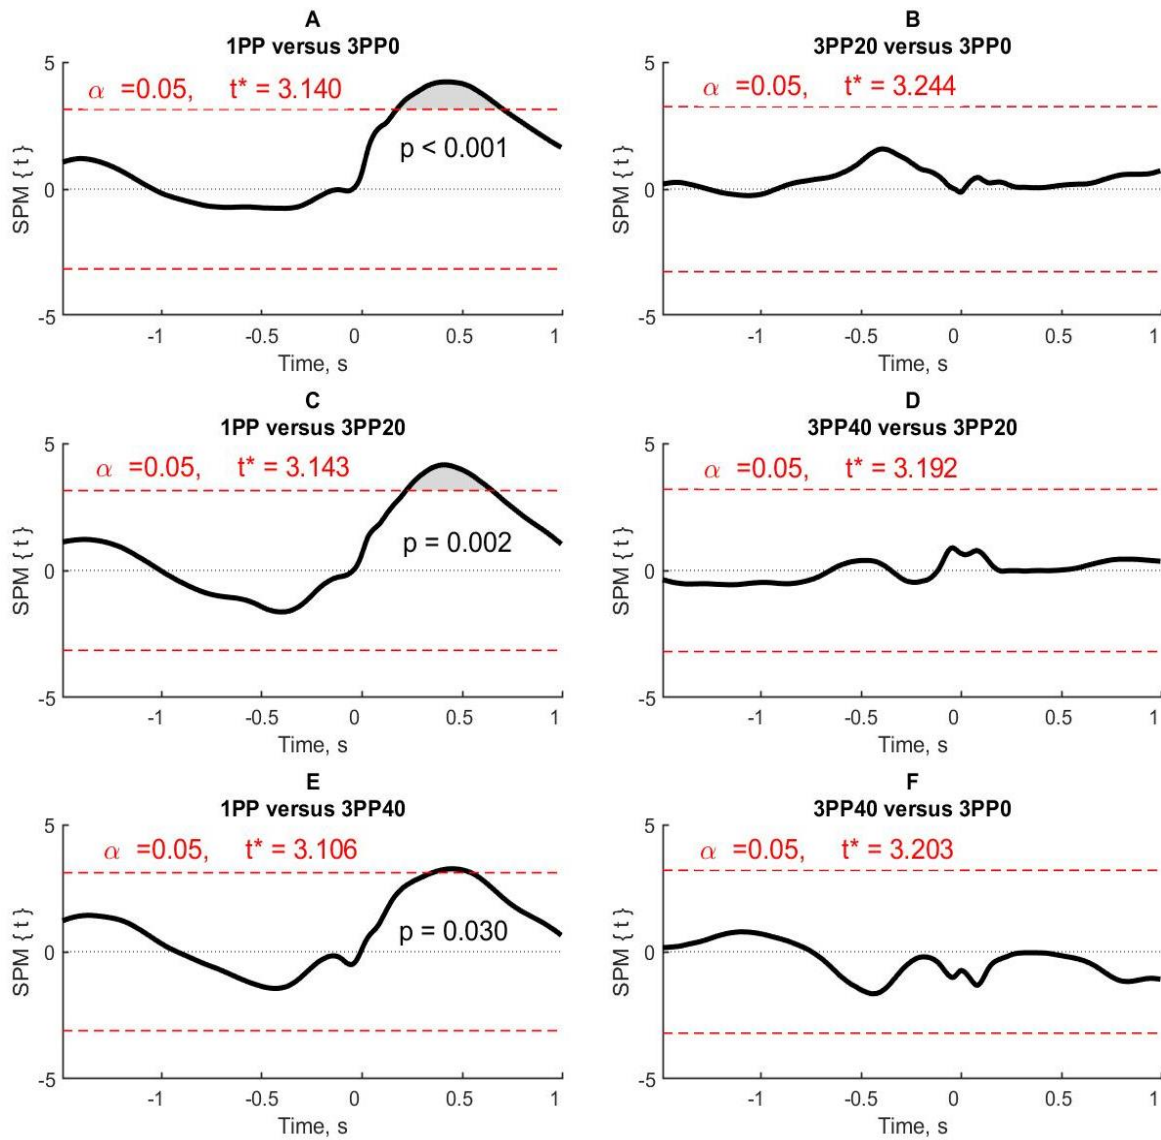

**Figure S5.** Pairwise comparisons mean displacement between conditions along the OZ axis. Red dashed lines denotes the statistically significant level (with FWER correction). Time 0 represents the moment of peak velocity of the right hand moving along the OY axis (along the direction of the throw).

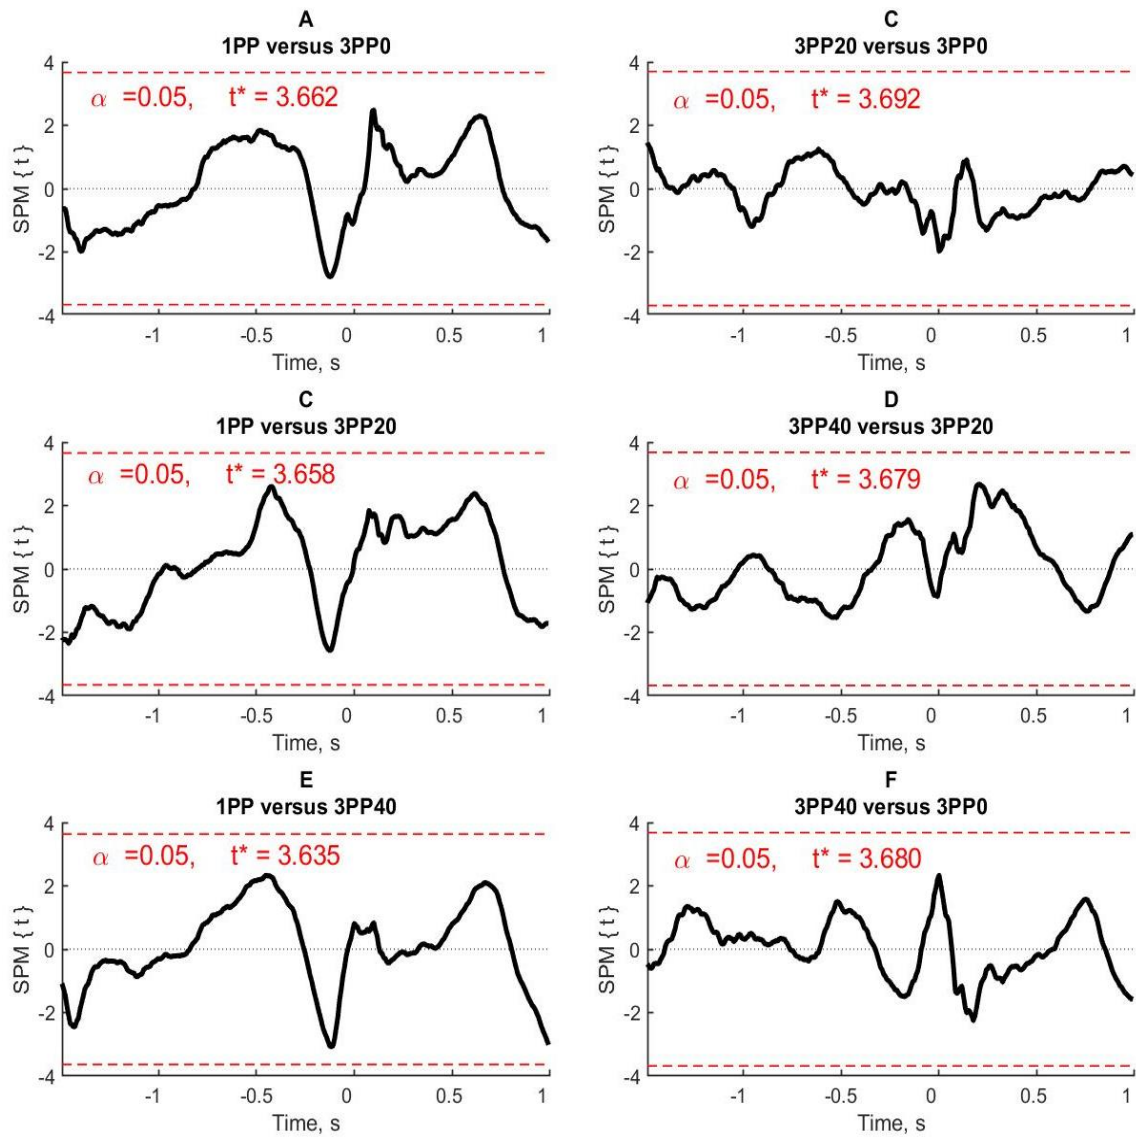

**Figure S6.** Pairwise comparisons mean velocity between conditions along the OX axis. Red dashed lines denotes the statistically significant level (with FWER correction). Time 0 represents the moment of peak velocity of the right hand moving along the OY axis (along the direction of the throw).

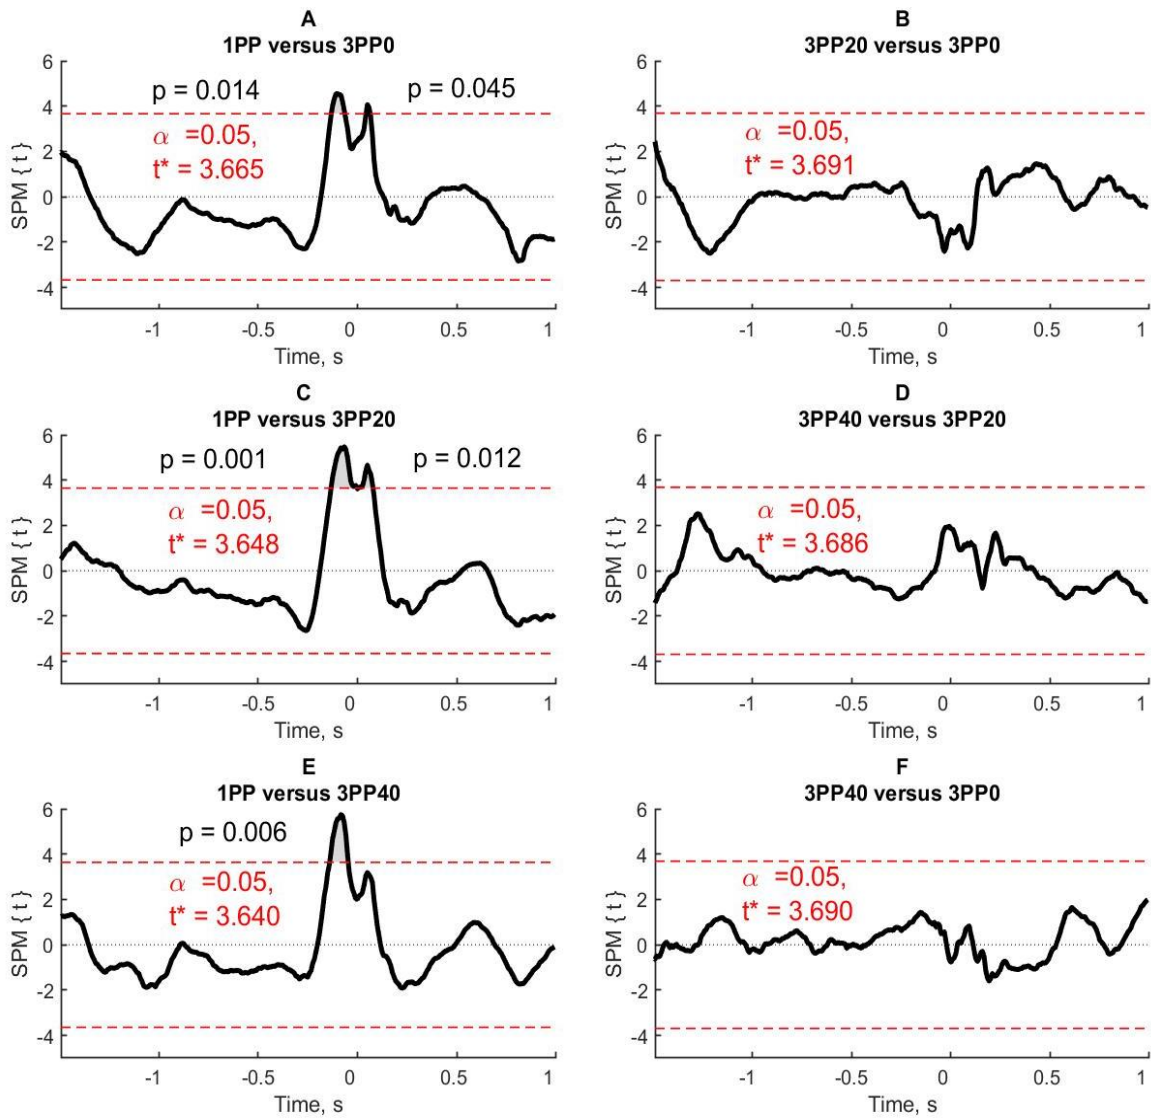

**Figure S7.** Pairwise comparisons mean velocity between conditions along the OY axis. Red dashed lines denotes the statistically significant level (with FWER correction). Time 0 represents the moment of peak velocity of the right hand moving along the OY axis (along the direction of the throw).



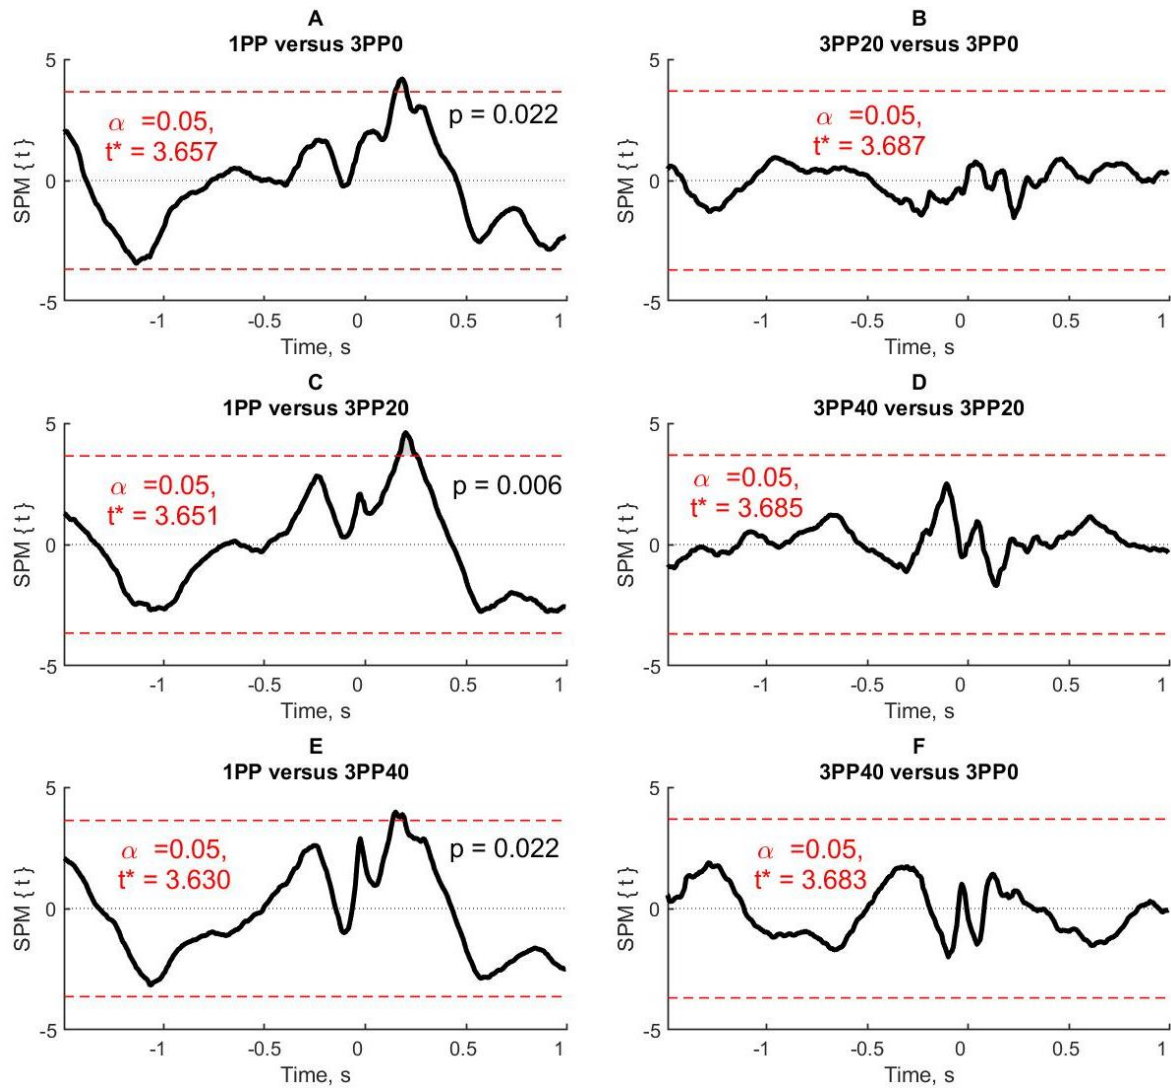

**Figure S8.** Pairwise comparisons mean velocity between conditions along the OZ axis. Red dashed lines denotes the statistically significant level (with FWER correction). Time 0 represents the moment of peak velocity of the right hand moving along the OY axis (along the direction of the throw).



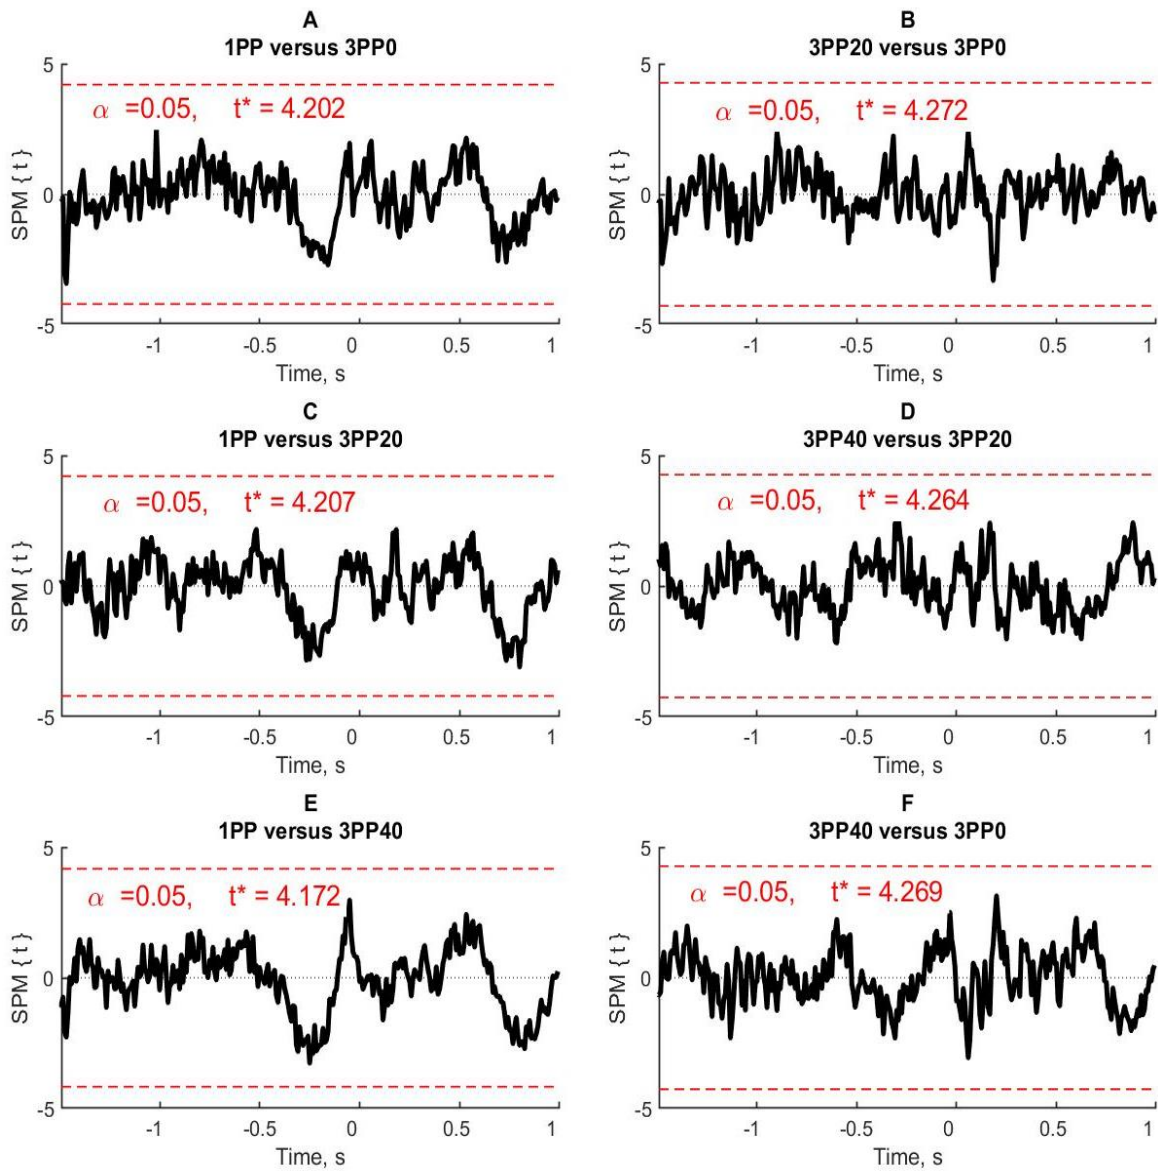

**Figure S9.** Pairwise comparisons mean acceleration between conditions along the OX axis. Red dashed lines denotes the statistically significant level (with FWER correction). Time 0 represents the moment of peak velocity of the right hand moving along the OY axis (along the direction of the throw).

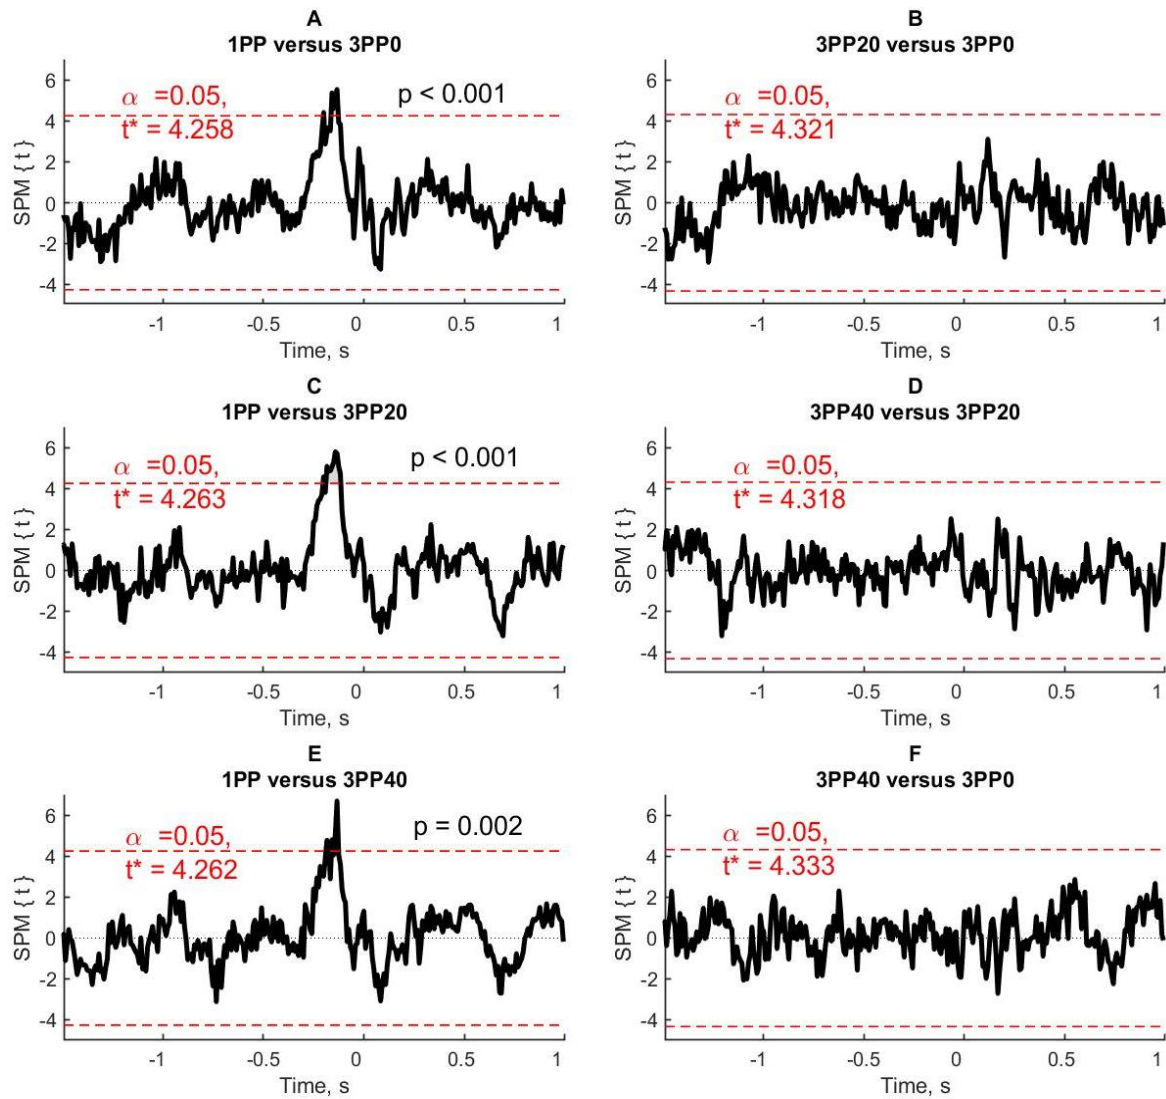

**Figure S10.** Pairwise comparisons mean acceleration between conditions along the OY axis. Red dashed lines denotes the statistically significant level (with FWER correction). Time 0 represents the moment of peak velocity of the right hand moving along the OY axis (along the direction of the throw).

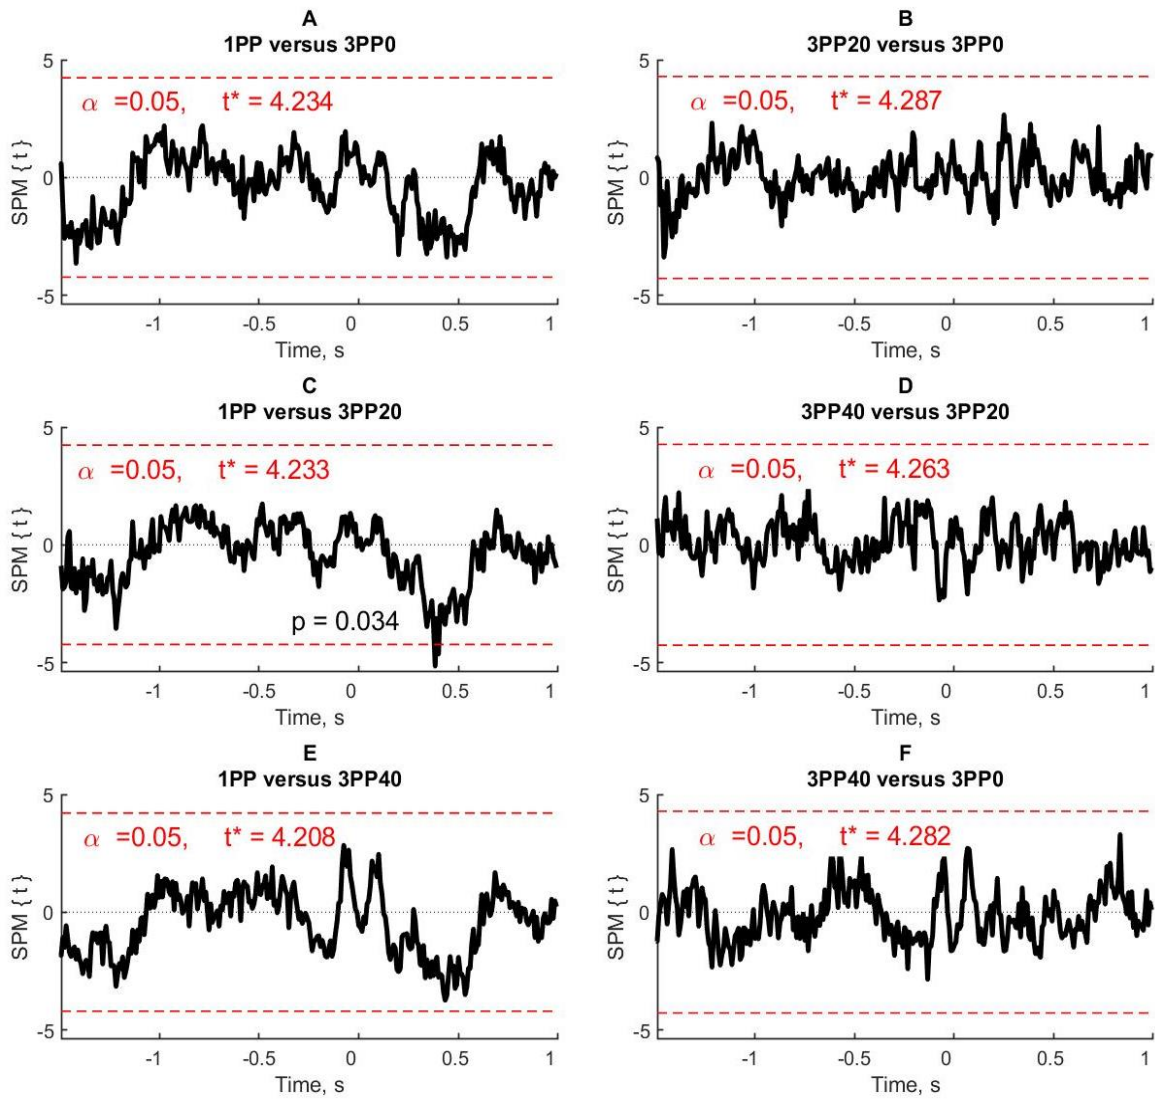

**Figure S11.** Pairwise comparisons mean acceleration between conditions along the OZ axis. Red dashed lines denotes the statistically significant level (with FWER correction). Time 0 represents the moment of peak velocity of the right hand moving along the OY axis (along the direction of the throw).

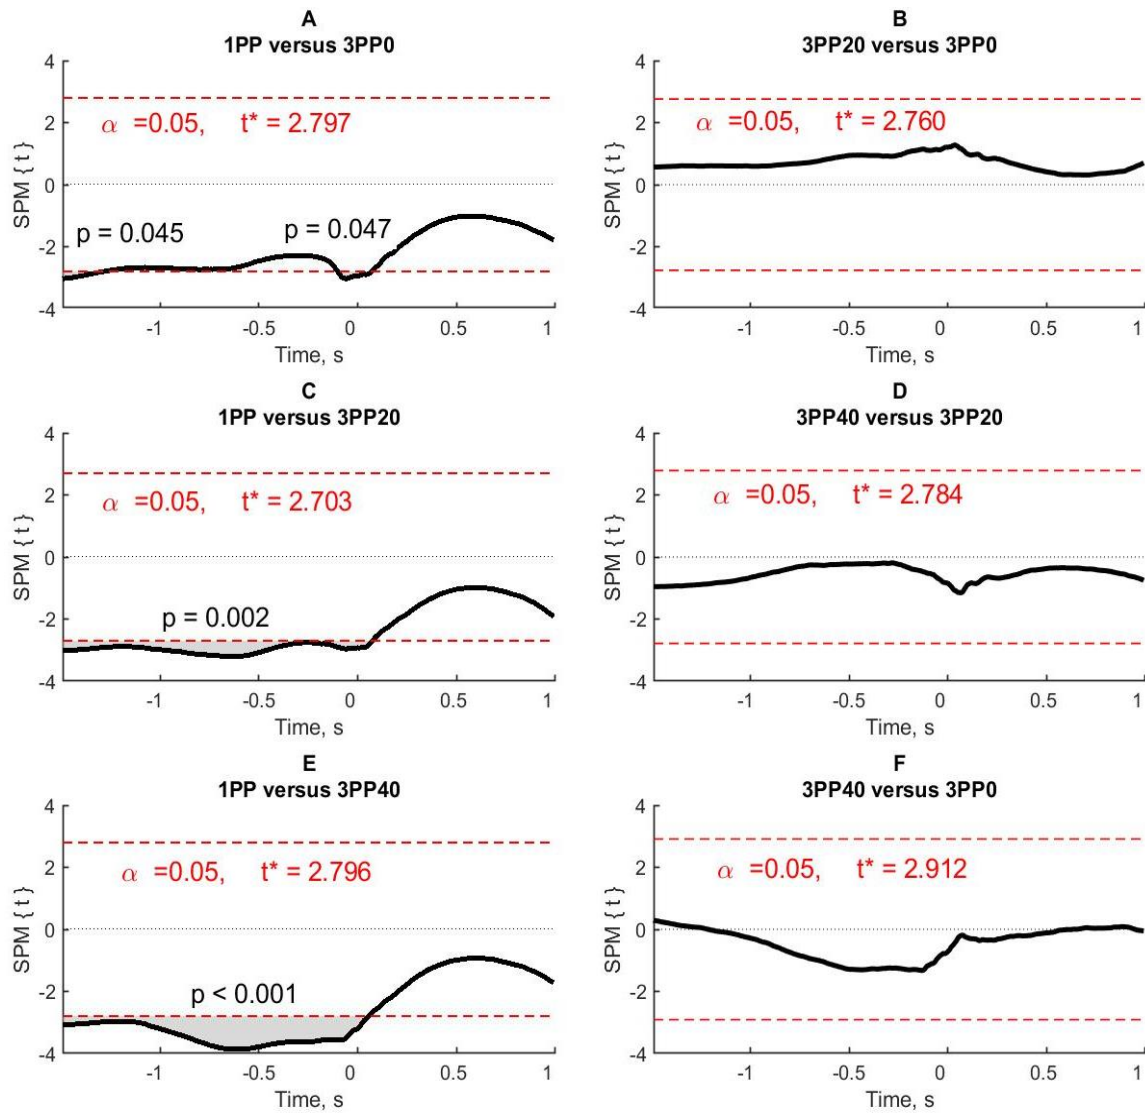

**Figure S12.** Pairwise comparisons mean angle torso rotation between conditions around the OZ axis. Red dashed lines denotes the statistically significant level (with FWER correction). Time 0 represents the moment of peak velocity of the right hand moving along the OY axis (along the direction of the throw).

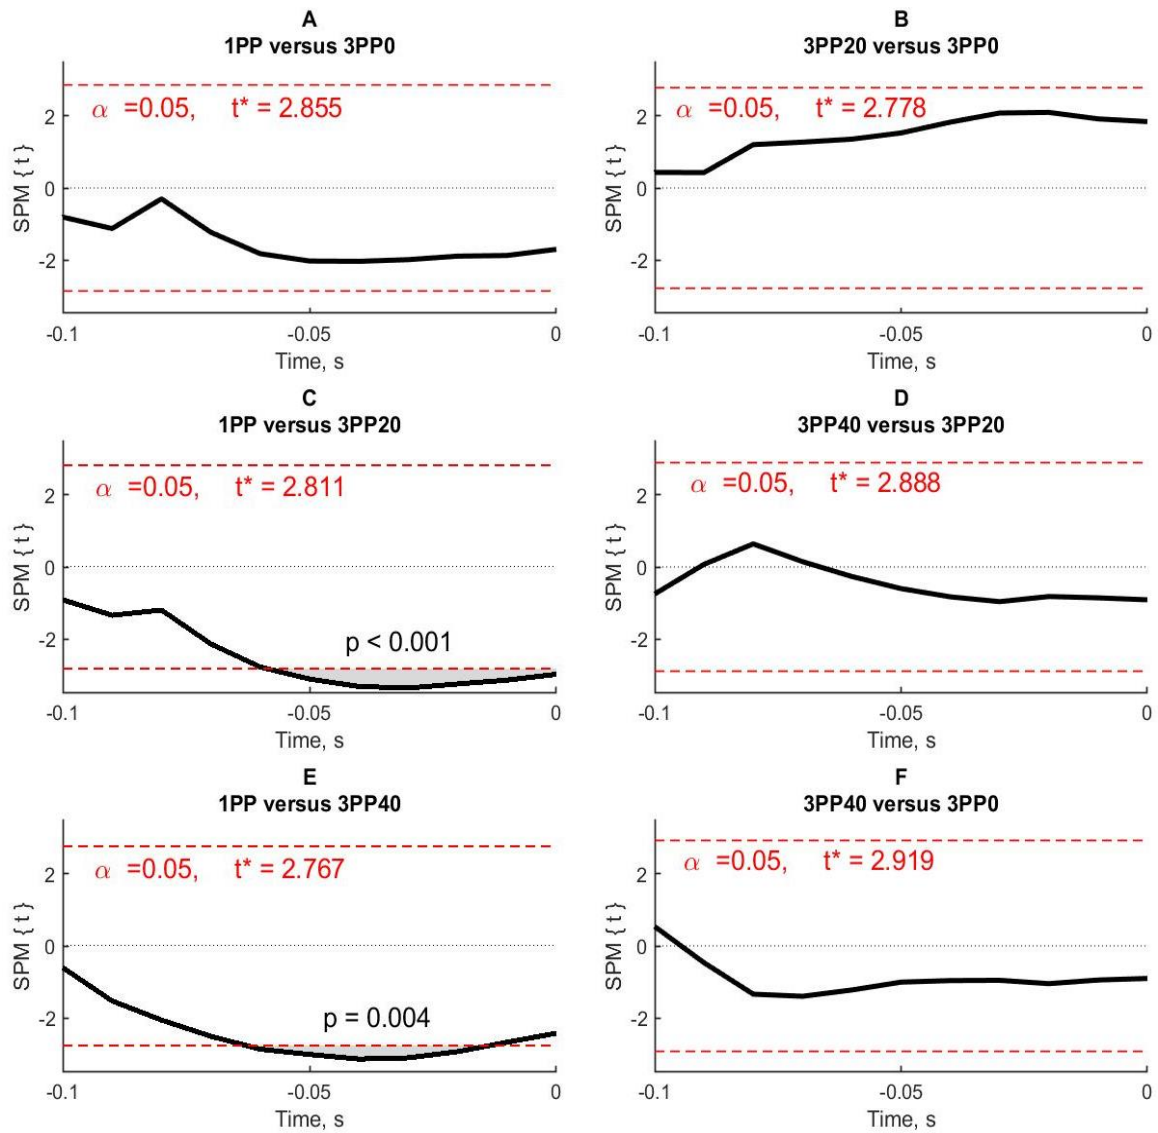

**Figure S13.** Pairwise comparisons mean right hand movement angle between conditions on the XY plane. Red dashed lines denotes the statistically significant level (with FWER correction). Time 0 represents the moment of peak velocity of the right hand moving along the OY axis (along the direction of the throw).
